# Supplementary material for: Highly selective oximation of aldehydes by reusable heterogeneous sandwich-type polyoxometalate catalyst
Source: Royal Society of Chemistry journal article supplement (doi:10.1039/c2dt30092c), 2012-01-01
Supplement: c2dt30092c.pdf [file c2dt30092c.pdf]

*Electronic Supplementary Information (ESI) for*

## **Highly Selective Oximation of Aldehydes Catalyzed by Recyclable Heterogeneous Sandwich-type Polyoxometalate**

Shen Zhao, Lu Liu and Yu-Fei Song\*

*State Key Laboratory of Chemical Resource Engineering, Beijing University of  
Chemical Technology, 100029 Beijing, P. R. China*

Email: [songyufei@hotmail.com](mailto:songyufei@hotmail.com); [songyf@mail.buct.edu.cn](mailto:songyf@mail.buct.edu.cn);

Tel/Fax : +86-10-64431832

### **Experimental section**

#### **Reagents and measurements**

Analytically pure NaOH,  $\text{Mg}(\text{NO}_3)_2 \cdot 6\text{H}_2\text{O}$ ,  $\text{Zn}(\text{NO}_3)_2 \cdot 6\text{H}_2\text{O}$ ,  $\text{Al}(\text{NO}_3)_3 \cdot 9\text{H}_2\text{O}$ ,  $\text{Na}_2\text{WO}_4 \cdot 2\text{H}_2\text{O}$ , aqueous 65%  $\text{HNO}_3$ , aqueous  $\text{NH}_3 \cdot \text{H}_2\text{O}$  (25 wt.%), aqueous  $\text{H}_2\text{O}_2$  (30 wt.%), Cyclohexanone (99%), Valeraldehyde (98%), 2-Methylvaleraldehyde (98%), Hexanal (98%), Heptanal (99%), Octanal (98%), Nonanal (99%), Decanal (96%), Cyclohexanecarboxaldehyde (98%), 9-Anthraldehyde (98%), Indole-3-carboxaldehyde (99%), Quinoline-2-carboxaldehyde (97%) and Fluorene-2-carboxaldehyde (99%) were purchased from Alfa Aesar and used without further purification.

Powder X-ray diffraction (XRD) patterns were recorded on a Rigaku XRD-6000 diffractometer under the following conditions: 40 kV, 30 mA, Cu  $\text{K}\alpha$  radiation ( $\lambda = 0.154 \text{ nm}$ ). Fourier transform infrared (FT-IR) spectra were recorded on a Bruker Vector 22 infrared spectrometer using KBr pellet method. Scanning electron microscopy (SEM) images and energy dispersive X-ray (EDX) analytical data were obtained using a Zeiss Supra 55 SEM equipped with an EDX detector. Transmission

electron microscopy (TEM) micrographs were recorded using a Hitachi H-800 instrument. Thermogravimetric (TG) analysis was carried out on a locally produced HCT-2 thermal analysis system in flowing N<sub>2</sub> with a heating rate of 10 °C·min<sup>-1</sup>. Inductively coupled plasma–atomic emission spectroscopy (ICP-AES) analysis was performed using a Shimadzu ICPS-7500 spectrometer. Nitrogen absorption and desorption experiments were performed at 77 K on a Quantachrome Autosorb-1C analyzer, and the samples were degassed at 120 °C for 6 hours before the measurements. <sup>1</sup>H-NMR spectra was recorded on a Bruker AV400 NMR spectrometer at resonance frequency of 400 MHz, and the chemical shifts were given relative to TMS as the internal reference. The products of the catalytic reactions of cyclohexanone and aliphatic aldehydes were analyzed by Agilent 7820A gas chromatography (GC) system using a 30 m 5% phenylmethyl silicone capillary column with an ID of 0.32 mm and 0.25 μm coating (HP-5). The products were identified using reference standards. The products of the catalytic reactions of polycyclic aromatic aldehydes were analyzed by Varian Prostar High Performance Liquid Chromatography (HPLC) system. Diluted samples of filtered reaction mixtures were eluted with methanol/water (30/70 vol.-% HPLC grade, 1 ml·min<sup>-1</sup>) on a ChromSpher5 C18 column, connected to a UV detector (λ = 254 nm). All above products were identified using reference standards.

## Preparation of catalysts

**Preparation of Na<sub>12</sub>[WZn<sub>3</sub>(H<sub>2</sub>O)<sub>2</sub>][ZnW<sub>9</sub>O<sub>34</sub>]<sub>2</sub>·46H<sub>2</sub>O (Na-Zn<sub>5</sub>W<sub>19</sub>).** This POM cluster was prepared and characterized according to the literature methods.<sup>S1</sup> The detailed procedure is as following: A solution of Na<sub>2</sub>WO<sub>4</sub>·2H<sub>2</sub>O (127 g, 0.38 mol) in 350 ml H<sub>2</sub>O was heated at 80~85 °C and vigorously stirred. The above solution was treated with (25 ml, 0.35 mol) aqueous 65% HNO<sub>3</sub> until the formed precipitate dissolved completely. A solution of Zn(NO<sub>3</sub>)<sub>2</sub>·6H<sub>2</sub>O (29.8 g, 0.10 mol) in 100 ml H<sub>2</sub>O was then added dropwise and the mixture was heated at 90~95 °C. The obtained solution was then evaporated to half volume, kept still at room temperature. After several days, the precipitate was filtered and the product was air-dried.

### **Preparation of the layered double hydroxides (LDHs) support of $\text{Mg}_3\text{Al-NO}_3$ .**

$\text{Mg}_3\text{Al-NO}_3$  was prepared using a method involving separate nucleation and aging steps (SNAS) developed by Duan et al.<sup>S2</sup> In a typical experiment, a solution of  $\text{Mg}(\text{NO}_3)_2 \cdot 6\text{H}_2\text{O}$  (7.7 g, 0.03 mol) and  $\text{Al}(\text{NO}_3)_3 \cdot 9\text{H}_2\text{O}$  (3.8 g, 0.01 mol) in 100 ml decarbonated  $\text{H}_2\text{O}$  ( $\text{Mg}/\text{Al}=3/1$ ) was mixed in a colloid mill rotating at 3000 rpm with a solution of NaOH (3.2 g, 0.08 mol) in 100 ml of decarbonated  $\text{H}_2\text{O}$ . In two minutes, the resulting slurry was transferred to autoclave for static crystallization at 100 °C. After aging for 12 hours, the slurry was separated into two equal portions. Both of the two portions were centrifuged and washed with boiling decarbonated  $\text{H}_2\text{O}$  for three times. One portion was dried at 60 °C overnight and used for characterization; the other was stored in refrigerator under  $\text{N}_2$  for the next step. The anion exchange capacity (AEC) of the  $\text{Mg}_3\text{Al-NO}_3$  stored in refrigerator is about 5 mmol (assuming 10 mmol  $\text{Al}^{3+}$  all incorporated into LDHs layers).

**Preparation of LDHs-POM catalyst.  $\text{Mg}_3\text{Al-Zn}_5\text{W}_{19}$  catalyst.** The detailed procedure is as follows: the slurry of  $\text{Mg}_3\text{Al-NO}_3$  was obtained by dispersing the precipitate of  $\text{Mg}_3\text{Al-NO}_3$  (AEC = 5 mmol) in 100 ml decarbonated  $\text{H}_2\text{O}$ . A solution of Na- $\text{Zn}_5\text{W}_{19}$  (5.0 g, 0.84 mmol) in 40 ml of decarbonated  $\text{H}_2\text{O}$  was added dropwise to the  $\text{Mg}_3\text{Al-NO}_3$  slurry under  $\text{N}_2$  with rapid stirring. The amount of Na- $\text{Zn}_5\text{W}_{19}$  (0.84 mmol,  $12 \times 0.84 \text{ mmol} \approx 10 \text{ mmol}$  of negative charge capacity) was two-fold excess of AEC of  $\text{Mg}_3\text{Al-NO}_3$ . The mixture slurry was stirred for 5 hours at 60 °C. Finally,  $\text{Mg}_3\text{Al-Zn}_5\text{W}_{19}$  catalyst was obtained as a white solid after being washed with boiling decarbonated water for three times and dried at 60 °C overnight under vacuum.

### **Procedure for oximation**

**Procedure for oximation of cyclohexanone and aliphatic aldehydes.** In a typical experiment, 1 mmol cyclohexanone or aliphatic aldehydes, aqueous  $\text{H}_2\text{O}_2$  (30 wt.%), aqueous  $\text{NH}_3 \cdot \text{H}_2\text{O}$  (25 wt.%), 2.5  $\mu\text{mol}$  Na- $\text{Zn}_5\text{W}_{19}$  or 24  $\mu\text{mol}$   $\text{Mg}_3\text{Al-Zn}_5\text{W}_{19}$  as catalyst and 200  $\mu\text{L}$  solvent were placed in a 20 ml glass bottle at room temperature and the reaction mixture was kept stirring vigorously. The reaction was effectively

quenched after 6 hours. The resulting oily products were extracted by dichloromethane, analyzed by GC and identified by  $^1\text{H-NMR}$  to determine the conversion and selectivity. After being washed with acetone, the  $\text{Mg}_3\text{Al-Zn}_5\text{W}_{19}$  catalyst was recovered by centrifugation, dried under vacuum and reused.

**Procedure for oximation of polycyclic aromatic aldehydes.** In a typical experiment, 1 mmol polycyclic aromatic aldehydes, aqueous  $\text{H}_2\text{O}_2$  (30 wt.%), aqueous  $\text{NH}_3\cdot\text{H}_2\text{O}$  (25 wt.%), 2.5  $\mu\text{mol}$   $\text{Na-Zn}_5\text{W}_{19}$  or 24  $\mu\text{mol}$   $\text{Mg}_3\text{Al-Zn}_5\text{W}_{19}$  as catalyst and 1 ml methanol were added to a 20 ml glass bottle at room temperature and vigorously stirred with a magnetic stirrer. The reaction was effectively quenched after 6 hours. The reaction mixtures were then diluted by methanol and filtered using a 0.22  $\mu\text{m}$  microfilter. The filtrate was analyzed by HPLC and identified by  $^1\text{H-NMR}$  to determine conversion and selectivity. After being washed with acetone, the  $\text{Mg}_3\text{Al-Zn}_5\text{W}_{19}$  catalyst was recovered by centrifugation, dried under vacuum and recycled.

## References

[S1] Y. Zhao, F. Li, R. Zhang, D. G. Evans and X. Duan, *Chem. Mater.*, 2002, **14**, 4286.

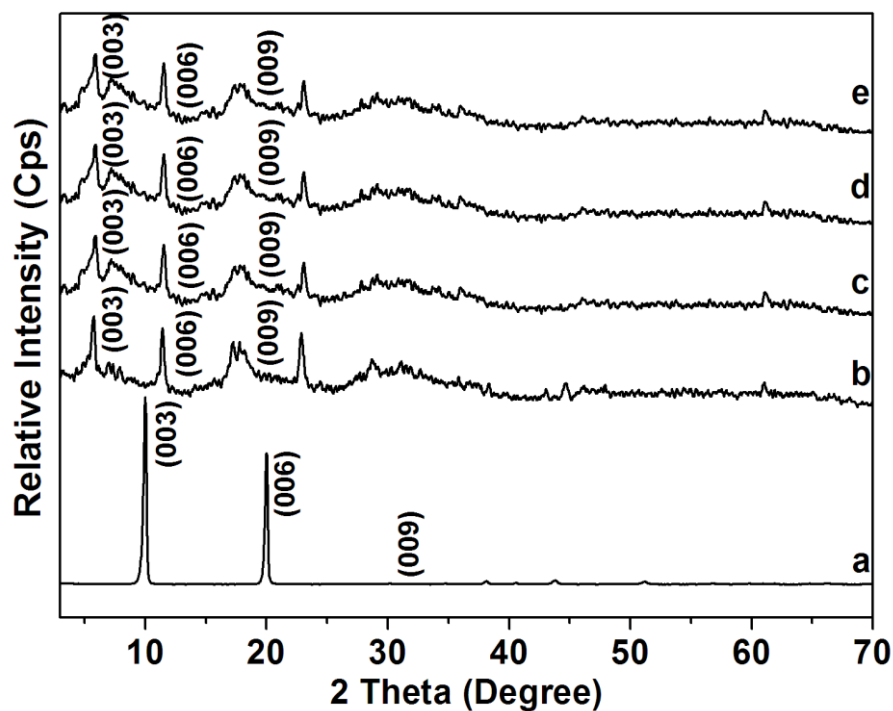

**Figure S1.** Powder XRD patterns of (a)  $\text{Mg}_3\text{Al-NO}_3$ , (b)  $\text{Mg}_3\text{Al-Zn}_5\text{W}_{19}$ , (c) the recycled  $\text{Mg}_3\text{Al-Zn}_5\text{W}_{19}$  catalyst for 3 times, (d) the recycled  $\text{Mg}_3\text{Al-Zn}_5\text{W}_{19}$  catalyst for 7 times and (e) the recycled  $\text{Mg}_3\text{Al-Zn}_5\text{W}_{19}$  catalyst for 10 times.

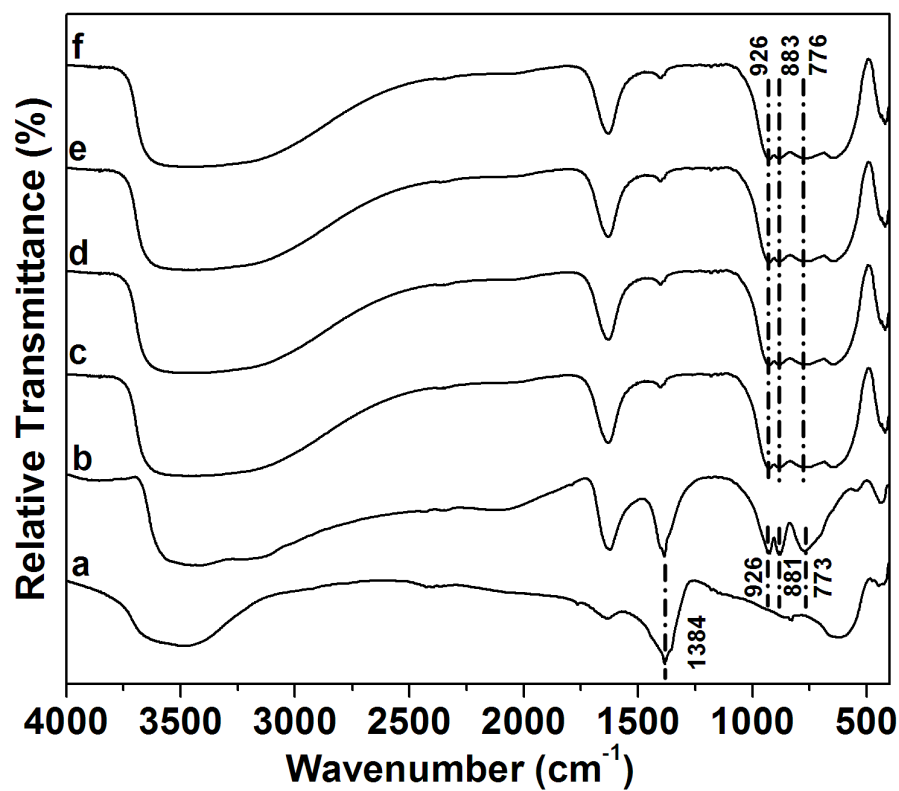

**Figure S2.** FT-IR spectra of (a)  $\text{Mg}_3\text{Al-NO}_3$ , (b)  $\text{Na-Zn}_5\text{W}_{19}$ , (c)  $\text{Mg}_3\text{Al-Zn}_5\text{W}_{19}$ , (d) recycled  $\text{Mg}_3\text{Al-Zn}_5\text{W}_{19}$  for 3 times, (e) recycled  $\text{Mg}_3\text{Al-Zn}_5\text{W}_{19}$  for 7 times and (f) recycled  $\text{Mg}_3\text{Al-Zn}_5\text{W}_{19}$  for 10 times.

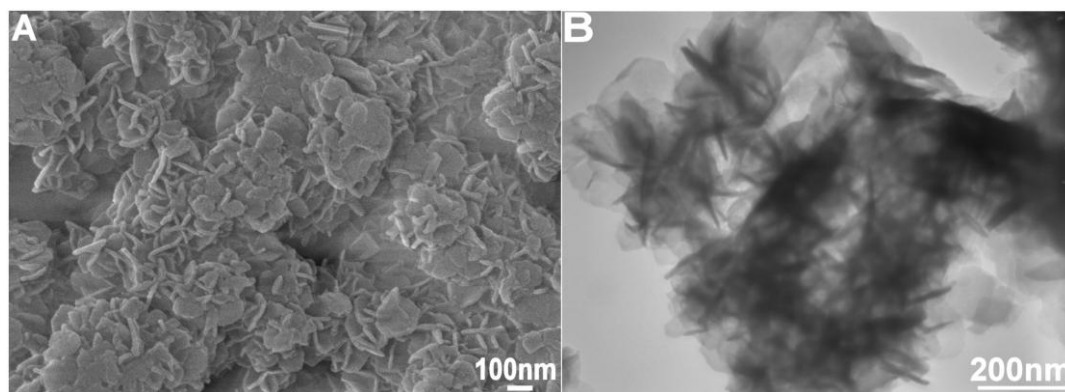

**Figure S3.** (A) SEM and (B) TEM images of  $\text{Mg}_3\text{Al-Zn}_5\text{W}_{19}$ .

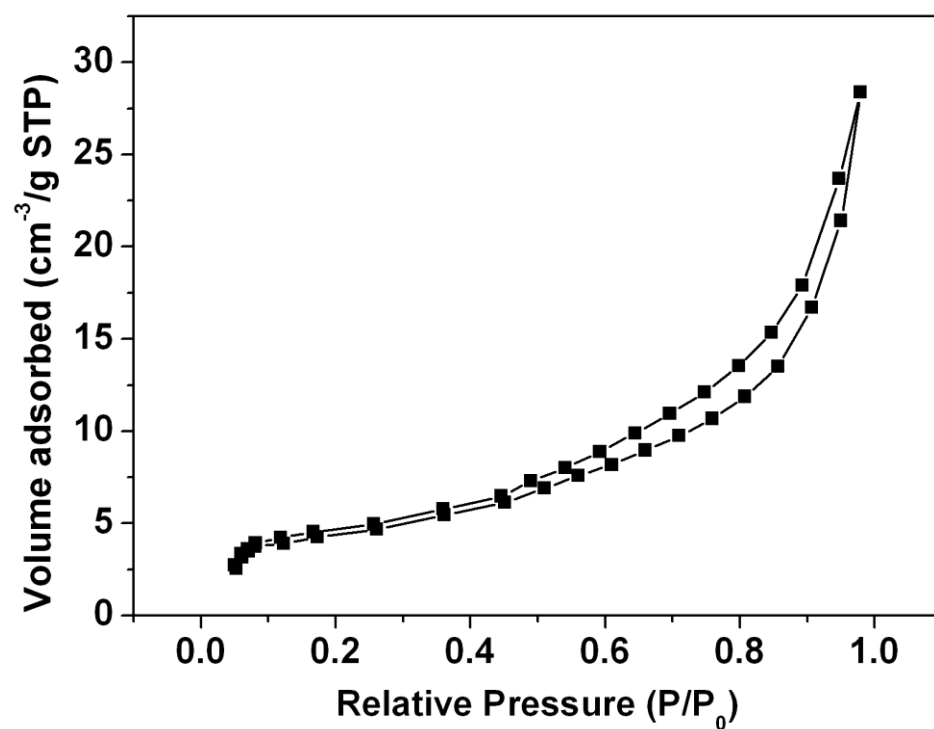

**Figure S4.**  $\text{N}_2$  adsorption-desorption isotherm of  $\text{Mg}_3\text{Al-Zn}_5\text{W}_{19}$ .

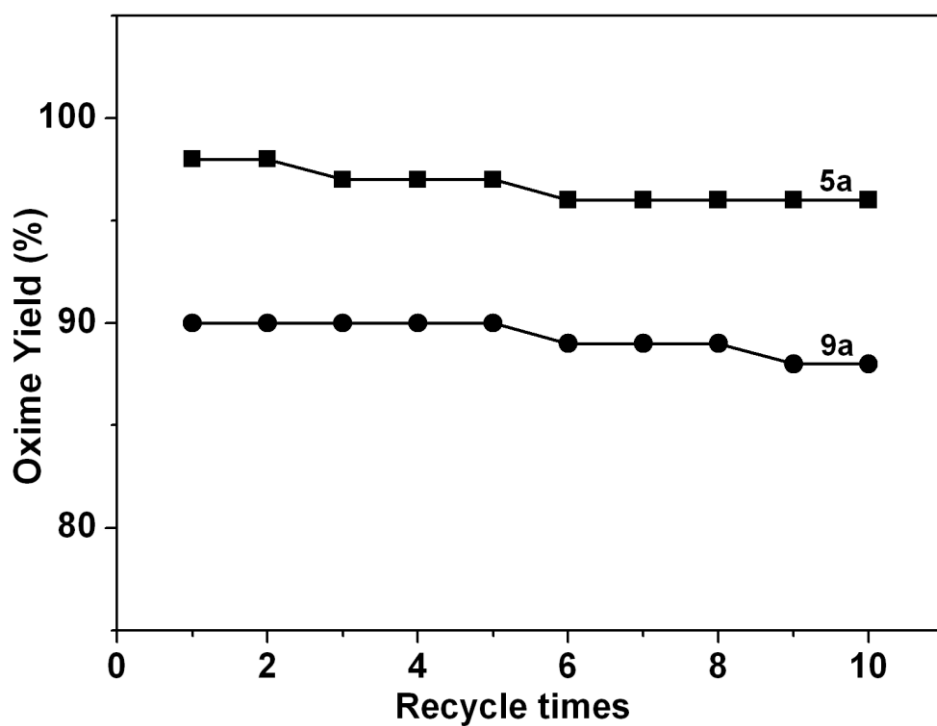

**Figure S5.** Oximation of **5a** and **9a** by  $\text{Mg}_3\text{Al-Zn}_5\text{W}_{19}$  and the catalyst are recycled for 10 times.

**Table S1.** Composition of Mg<sub>3</sub>Al-NO<sub>3</sub> and Mg<sub>3</sub>Al-Zn<sub>5</sub>W<sub>19</sub>.

| Sample                                             | <i>d</i> (003)<br>(nm) | Composition<br>(Mg: Al:<br>Zn: W) <sup>a</sup> | <i>S</i> <sub>BET</sub><br>(m <sup>2</sup> ·g <sup>-1</sup> ) | <i>S</i> <sub>Microporous</sub><br>(m <sup>2</sup> ·g <sup>-1</sup> ) <sup>b</sup> | Formula <sup>c</sup>                                                                                                                              |
|----------------------------------------------------|------------------------|------------------------------------------------|---------------------------------------------------------------|------------------------------------------------------------------------------------|---------------------------------------------------------------------------------------------------------------------------------------------------|
| Mg <sub>3</sub> Al-NO <sub>3</sub>                 | 0.88                   | 3.08 : 1.00 :<br>0.00 : 0.00                   | 7                                                             | 0                                                                                  | Mg <sub>0.75</sub> Al <sub>0.25</sub> (OH) <sub>2</sub> (NO <sub>3</sub> ) <sub>0.25</sub> ·0.37H <sub>2</sub> O                                  |
| Mg <sub>3</sub> Al-Zn <sub>5</sub> W <sub>19</sub> | 1.54                   | 3.05 : 1.00 :<br>0.42 : 1.59                   | 24                                                            | 6                                                                                  | Mg <sub>0.75</sub> Al <sub>0.25</sub> (OH) <sub>2</sub> (Zn <sub>5</sub> W <sub>19</sub> O <sub>68</sub> ) <sub>0.021</sub> ·1.26H <sub>2</sub> O |

a determined by ICP-AES. b determined by the t-plot method. c determined by ICP-AES and TG.

**Table S2.** Optimization of the cyclohexanone: H<sub>2</sub>O<sub>2</sub>: NH<sub>3</sub> ratio for oximation of cyclohexanone by Mg<sub>3</sub>Al-Zn<sub>5</sub>W<sub>19</sub> in water.

| Entry | Cyclohexanone: H <sub>2</sub> O <sub>2</sub> : NH <sub>3</sub> | Conversion | Selectivity | Yield <sup>a</sup> |
|-------|----------------------------------------------------------------|------------|-------------|--------------------|
| 1     | 1:4:2                                                          | 90         | 67          | 60                 |
| 2     | 1:4:3                                                          | 91         | 74          | 67                 |
| 3     | 1:4:4                                                          | 92         | 78          | 72                 |
| 4     | 1:4:5                                                          | 91         | 71          | 65                 |
| 5     | 1:5:2                                                          | 94         | 85          | 80                 |
| 6     | 1:5:3                                                          | 95         | 86          | 82                 |
| 7     | 1:5:4                                                          | 98         | 92          | 90                 |
| 8     | 1:5:5                                                          | 96         | 84          | 81                 |
| 9     | 1:6:2                                                          | 95         | 71          | 67                 |
| 10    | 1:6:3                                                          | 95         | 76          | 72                 |
| 11    | 1:6:4                                                          | 96         | 84          | 81                 |
| 12    | 1:6:5                                                          | 97         | 75          | 73                 |

a: Yield = Conversion × Selectivity.

**Table S3.** Selection of solvents for oximation of cyclohexanone by Mg<sub>3</sub>Al-Zn<sub>5</sub>W<sub>19</sub> with cyclohexanone: H<sub>2</sub>O<sub>2</sub>: NH<sub>3</sub>=1:5:4.

| Entry | Solvents             | Conversion | Selectivity | Yield <sup>a</sup> |
|-------|----------------------|------------|-------------|--------------------|
| 1     | Water                | 98         | 92          | 90                 |
| 2     | Methanol             | 98         | 62          | 61                 |
| 3     | Ethanol              | 96         | 78          | 75                 |
| 4     | 1-Propanol           | 96         | 86          | 80                 |
| 5     | <i>iso</i> -Propanol | 92         | 72          | 66                 |
| 6     | 1-Butanol            | 99         | 99          | 98                 |
| 7     | <i>tert</i> -Butanol | 91         | 81          | 74                 |

a: Yield = Conversion × Selectivity.

**Table S4.** ICP measurements of the composition of the catalyst (Mg<sub>3</sub>Al-Zn<sub>5</sub>W<sub>19</sub>).

| Samples                                                             | Composition<br>(Mg: Al: Zn: W) <sup>a</sup> |
|---------------------------------------------------------------------|---------------------------------------------|
| Mg <sub>3</sub> Al-Zn <sub>5</sub> W <sub>19</sub> -Fresh           | 3.05 : 1.00 : 0.42 : 1.59                   |
| Mg <sub>3</sub> Al-Zn <sub>5</sub> W <sub>19</sub> -Reused-3 times  | 3.04 : 1.00 : 0.41 : 1.58                   |
| Mg <sub>3</sub> Al-Zn <sub>5</sub> W <sub>19</sub> -Reused-7 times  | 3.04 : 1.00 : 0.41 : 1.58                   |
| Mg <sub>3</sub> Al-Zn <sub>5</sub> W <sub>19</sub> -Reused-10 times | 3.03 : 1.00 : 0.40 : 1.57                   |

a: Determined by ICP-AES.
